# Supplementary material
Source: Springer Nature journal article supplement (https://www.springermedizin.de/resource/supplementary/12984_2006_113_MOESM5_ESM.pdf/9605332)
Supplement: MOESM5 [file 9605332]

Table3 The mean  $\rho_{max}$  obtained in the rest before and after video presentation (control), the mean  $\rho_{max}$  obtained during video presentation (video), and the  $\rho_{max\_ratio}$ .

|                | <b>control</b>  | <b>video</b>      | <b><math>\rho_{max\_ratio}</math></b> |
|----------------|-----------------|-------------------|---------------------------------------|
| <b>movie A</b> | $0.65 \pm 0.10$ | $0.66 \pm 0.13$   | $1.03 \pm 0.06$                       |
| <b>movie D</b> | $0.66 \pm 0.12$ | $0.70 \pm 0.08^*$ | $1.11 \pm 0.05$                       |
| <b>movie R</b> | $0.66 \pm 0.09$ | $0.69 \pm 0.12$   | $1.08 \pm 0.07$                       |
